# Supplementary material
Source: Springer Nature journal article supplement (https://www.springermedizin.de/resource/supplementary/12990_2009_234_MOESM6_ESM.pdf/9612850)

## A. Effects of bursting stimuli

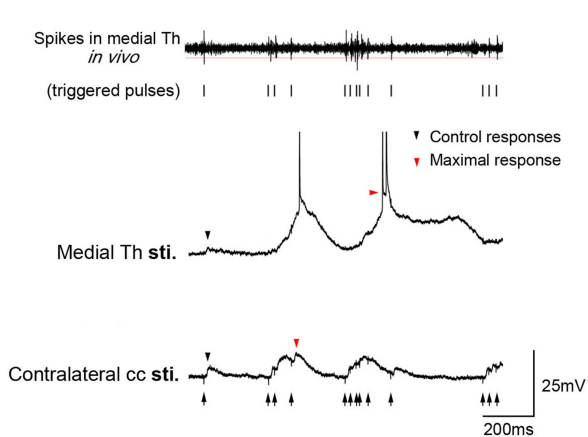

## B. Involvement of polysynapse and NMDA

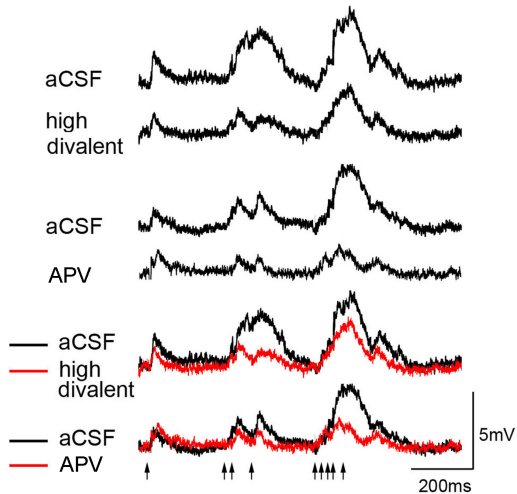

Supplement: MOESM6 [file 9612850]
